# Supplementary material for: Development of fluorescent lateral flow test strips based on an electrospun molecularly imprinted membrane for detection of triazophos residues in tap water
Source: Royal Society of Chemistry journal article supplement (doi:10.1039/d0nj00269k), 2020-01-01
Supplement: d0nj00269k1.pdf [file d0nj00269k1.pdf]

**Electronic Supporting Material**

**Development of a fluorescent lateral flow strips based on electrospinning  
molecular imprinting membrane for detection of triazophos residues in tap  
water**

**Yahui He<sup>1,3\*</sup>, Sihui Hong<sup>2</sup>, Miao Wang<sup>2</sup>, Jing Wang<sup>1</sup>, A. M. Abd El-Aty<sup>3,4</sup>, Jing  
Wang<sup>2</sup>\*, Ahmet Hacimuftuoglu<sup>4</sup>, Majid Khan<sup>1</sup>, Yongxin She<sup>2\*</sup>**

*<sup>1</sup>China-Canada Joint Lab of Food Nutrition and Health (Beijing), Beijing Technology  
& Business University, 100048, P.R. China*

*<sup>2</sup> Institute of Quality Standards & Testing Technology for Agro-Products, Chinese  
Academy of Agricultural Sciences, Beijing 100081, P.R. China*

*<sup>3</sup>Beijing Advanced Innovation Center for Food Nutrition and Human Health, 100048,  
P.R. China*

*<sup>4</sup> Department of Pharmacology, Faculty of Veterinary Medicine, Cairo University,  
12211-Giza, Egypt*

*<sup>5</sup> Department of Medical Pharmacology, Medical Faculty, Ataturk University, 25240-  
Erzurum, Turkey*

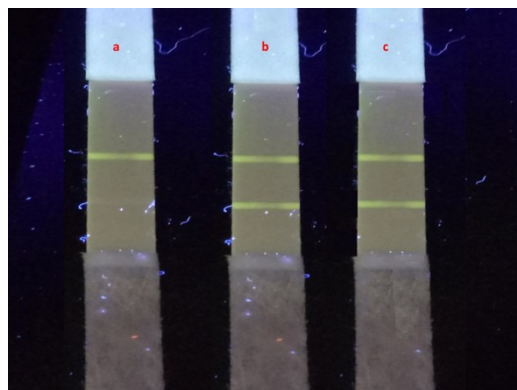

Fig. S1. Images of comparison of molecularly imprinted T-Line prepared via direct dipping and electrospinning methods. a) T-line painted directly with  $0.5 \text{ mg mL}^{-1}$  MIP particles, b) T-line prepared by electrospinning  $0.5 \text{ mg mL}^{-1}$  MIP, and c) T-line painted directly with  $50 \text{ mg mL}^{-1}$  MIP.

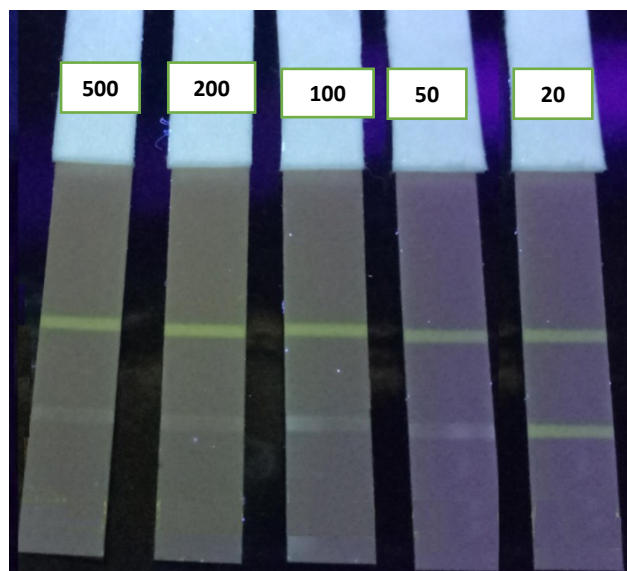

Fig. S2. Images of a series concentrations (20, 50, 100, 200, and 500  $\mu\text{g L}^{-1}$ ) of triazophos standard solution spiked into tap water for test strips.

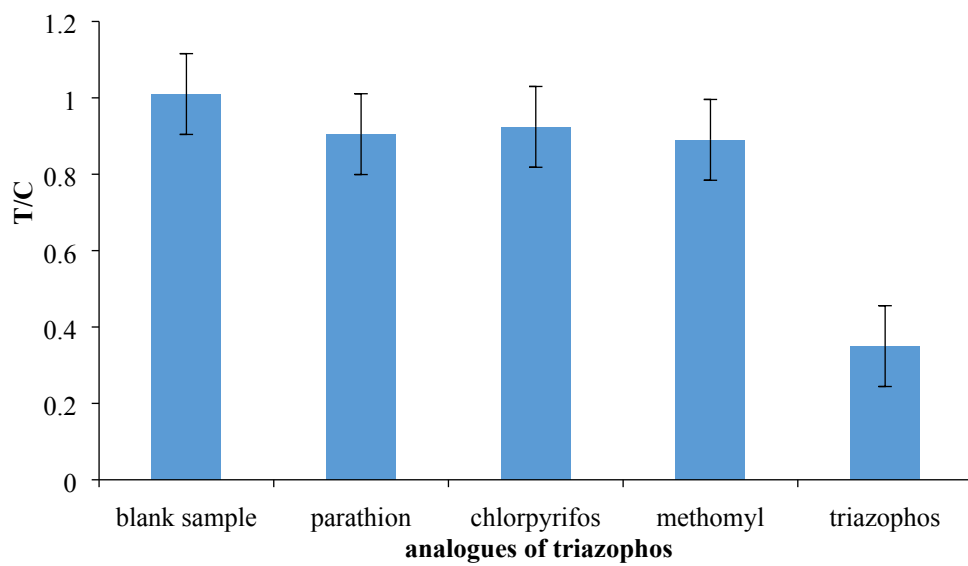

Fig. S3. The T/C values for triazophos and its analogues.
